# Supplementary material
Source: publisher site journal article supplement (https://www.dovepress.com/article/345336)
Supplement: Supplementary file 1 [file get_supplementary_file.php]

**Supplementary Table 1.** List of Upregulated genes and their fold change in metastatic set

| <b>Gene Name</b> | <b>Fold Change</b> |
|------------------|--------------------|
| RXRG             | 2.88               |
| SYTL5            | 2.68               |
| KLK10            | 2.65               |
| HMGA2            | 2.61               |
| DCSTAMP          | 2.60               |
| GABRB2           | 2.58               |
| PRR15            | 2.54               |
| CLDN10           | 2.48               |
| METTL7B          | 2.43               |
| PDZK1IP1         | 2.40               |
| LINC02555        | 2.37               |
| LAMB3            | 2.32               |
| EGFEM1P          | 2.30               |
| ZCCHC12          | 2.30               |
| NMU              | 2.29               |
| FAXC             | 2.28               |
| LEMD1            | 2.26               |
| ARHGAP36         | 2.22               |
| GOLT1A           | 2.22               |
| LRRK2-DT         | 2.15               |
| SYT12            | 2.15               |
| KLHDC8A          | 2.14               |
| TMPRSS4          | 2.12               |
| PRSS2            | 2.11               |
| NGEF             | 2.09               |
| RYR1             | 2.09               |
| AHNAK2           | 2.08               |
| SCEL             | 2.07               |
| PDZRN4           | 2.06               |
| ST6GALNAC5       | 2.05               |
| CLDN16           | 2.03               |
| CDH3             | 2.00               |
| SLC27A6          | 2.00               |
| CITED1           | 1.97               |
| TRDC             | 1.97               |
| FAM230B          | 1.97               |
| KCNN4            | 1.97               |
| LRRC52-AS1       | 1.95               |
| KCNQ3            | 1.94               |
| GLT1D1           | 1.92               |
| ADORA1           | 1.92               |
| TENM1            | 1.92               |
| FAM20A           | 1.91               |

|           |      |
|-----------|------|
| MIR31HG   | 1.91 |
| ABCC3     | 1.90 |
| KCNJ2     | 1.90 |
| HPCAL4    | 1.89 |
| LAMP5     | 1.87 |
| TM4SF4    | 1.87 |
| THRSP     | 1.87 |
| GDF15     | 1.85 |
| LRP4      | 1.85 |
| ALOX15B   | 1.85 |
| LINC00891 | 1.85 |
| LCN2      | 1.84 |
| AGR2      | 1.83 |
| KLK11     | 1.80 |
| RAB27B    | 1.80 |
| ECM1      | 1.80 |
| GALE      | 1.79 |
| EVA1A     | 1.76 |
| DPP4      | 1.76 |
| TUSC3     | 1.75 |
| COMP      | 1.74 |
| NFE2L3    | 1.74 |
| PLPP2     | 1.73 |
| ULBP2     | 1.73 |
| NR2F1-AS1 | 1.73 |
| CD1A      | 1.72 |
| LIPH      | 1.72 |
| CRLF1     | 1.72 |
| GAP43     | 1.71 |
| CTXND1    | 1.70 |
| SYT1      | 1.70 |
| CEACAM6   | 1.69 |
| SPTBN2    | 1.69 |
| HS6ST2    | 1.69 |
| SLC34A2   | 1.69 |
| CCL13     | 1.68 |
| ALDH1A3   | 1.67 |
| ETV4      | 1.67 |
| TDO2      | 1.67 |
| DOCK9-DT  | 1.67 |
| NOD1      | 1.66 |
| KISS1R    | 1.65 |
| GLDN      | 1.65 |
| ETNK2     | 1.65 |
| STK32A    | 1.63 |
| TIAM1     | 1.63 |

|           |      |
|-----------|------|
| KRT19     | 1.63 |
| TMEM79    | 1.63 |
| PCSK1N    | 1.62 |
| ABTB2     | 1.62 |
| CHI3L1    | 1.62 |
| IGSF1     | 1.62 |
| S100A5    | 1.62 |
| TESC      | 1.62 |
| TNFRSF12A | 1.61 |
| SLIT1     | 1.60 |
| LPAR5     | 1.59 |
| PLAU      | 1.59 |
| BRINP1    | 1.59 |
| MMP16     | 1.59 |
| LRRK2     | 1.58 |
| CLDN1     | 1.58 |
| TMEM163   | 1.58 |
| MFAP2     | 1.57 |
| INAVA     | 1.57 |
| SHROOM4   | 1.57 |
| B3GNT3    | 1.57 |
| MIR100HG  | 1.57 |
| HLA-DQB2  | 1.56 |
| NPTXR     | 1.56 |
| CDKN2B    | 1.56 |
| CYP1B1    | 1.55 |
| NAPSA     | 1.55 |
| MAMLD1    | 1.55 |
| TRIM29    | 1.55 |
| IL17RD    | 1.55 |
| SYTL1     | 1.55 |
| TACSTD2   | 1.55 |
| RIMS2     | 1.55 |
| ACP5      | 1.54 |
| NAT8L     | 1.54 |
| PC        | 1.54 |
| C19orf33  | 1.53 |
| CORO2A    | 1.53 |
| SPOCK1    | 1.53 |
| MACC1     | 1.53 |
| NRCAM     | 1.53 |
| PLEKHA4   | 1.52 |
| NHSL2     | 1.52 |
| MEX3D     | 1.52 |
| ADTRP     | 1.52 |
| NOX4      | 1.52 |

|         |      |
|---------|------|
| KRT80   | 1.52 |
| EMILIN2 | 1.52 |
| H2BC8   | 1.51 |
| KLK7    | 1.50 |

**Supplementary Table 2.** List of downregulated genes and their fold change in metastatic set

| Gene Name | Fold Change |
|-----------|-------------|
| CRABP1    | 0.49        |
| DIRAS2    | 0.49        |
| PLA2R1    | 0.49        |
| SEMA3D    | 0.49        |
| RYR2      | 0.48        |
| TMEM139   | 0.48        |
| STXBP5L   | 0.48        |
| TFF3      | 0.47        |
| DGKI      | 0.47        |
| CDH16     | 0.47        |
| ADH1B     | 0.46        |
| SERTM1    | 0.45        |
| IGFBPL1   | 0.45        |
| PKHD1L1   | 0.45        |
| IPCEF1    | 0.44        |
| ZMAT4     | 0.43        |
| MRO       | 0.43        |
| SCARA5    | 0.43        |
| SNORD3B-1 | 0.41        |
| LRP1B     | 0.39        |

**Supplementary Table 3.** List of upregulated genes and their fold change in non-aggressive set

| Gene Name  | Fold Change |
|------------|-------------|
| DCSTAMP    | 3.09        |
| KLK10      | 2.94        |
| GABRB2     | 2.87        |
| RXRG       | 2.81        |
| SYTL5      | 2.80        |
| CLDN10     | 2.61        |
| PRSS2      | 2.59        |
| HMGA2      | 2.55        |
| PRR15      | 2.55        |
| LRRC52-AS1 | 2.54        |
| PDZK1IP1   | 2.44        |
| ARHGAP36   | 2.40        |
| TMPRSS4    | 2.33        |
| AHNAK2     | 2.29        |

|            |      |
|------------|------|
| ST6GALNAC5 | 2.29 |
| GAP43      | 2.29 |
| LAMB3      | 2.27 |
| METTL7B    | 2.25 |
| LEMD1      | 2.24 |
| FAXC       | 2.20 |
| FAM230B    | 2.19 |
| SYT12      | 2.19 |
| GOLT1A     | 2.18 |
| LAMP5      | 2.17 |
| ZCCHC12    | 2.15 |
| KLHDC8A    | 2.14 |
| CITED1     | 2.10 |
| NGEF       | 2.09 |
| LRRK2-DT   | 2.08 |
| GDF15      | 2.05 |
| RIMS2      | 2.04 |
| KCNQ3      | 2.03 |
| SCEL       | 2.03 |
| LCN2       | 2.00 |
| CDH3       | 2.00 |
| SLC27A6    | 1.99 |
| LINC02555  | 1.99 |
| KLK7       | 1.98 |
| ABCC3      | 1.97 |
| KCNJ2      | 1.97 |
| KCNN4      | 1.96 |
| EGFEM1P    | 1.96 |
| RAB27B     | 1.95 |
| NMU        | 1.95 |
| TRDC       | 1.95 |
| CD1A       | 1.94 |
| BRINP1     | 1.92 |
| LIPH       | 1.91 |
| FAM20A     | 1.90 |
| TENM1      | 1.90 |
| KLK11      | 1.89 |
| PDZRN4     | 1.88 |
| CDKN2B     | 1.87 |
| RYR1       | 1.86 |
| LRP4       | 1.84 |
| MIR31HG    | 1.83 |
| TMEM163    | 1.82 |
| SPTBN2     | 1.82 |
| SLC34A2    | 1.81 |
| ADTRP      | 1.80 |

|           |      |
|-----------|------|
| ADORA1    | 1.79 |
| THRSP     | 1.78 |
| ALOX15B   | 1.78 |
| CHI3L1    | 1.75 |
| BEAN1     | 1.75 |
| GLDN      | 1.75 |
| STK32A    | 1.74 |
| CTXND1    | 1.74 |
| ALDH1A3   | 1.74 |
| TIAM1     | 1.73 |
| SYT1      | 1.72 |
| COMP      | 1.72 |
| SHROOM4   | 1.72 |
| CEACAM6   | 1.72 |
| AGR2      | 1.71 |
| GLT1D1    | 1.71 |
| GALE      | 1.71 |
| CLDN16    | 1.71 |
| HRH1      | 1.70 |
| HLA-DQB2  | 1.69 |
| NOD1      | 1.69 |
| NR2F1-AS1 | 1.69 |
| DPP4      | 1.69 |
| CXCL17    | 1.69 |
| LPAR5     | 1.68 |
| ULBP2     | 1.68 |
| S100B     | 1.67 |
| MMP16     | 1.67 |
| KISS1R    | 1.67 |
| EVA1A     | 1.65 |
| PTP4A3    | 1.65 |
| SDK1      | 1.65 |
| DEPDC1B   | 1.65 |
| NFE2L3    | 1.65 |
| DOK7      | 1.65 |
| CCL13     | 1.64 |
| MAMLD1    | 1.64 |
| CYP1B1    | 1.63 |
| MKX       | 1.63 |
| IGSF1     | 1.63 |
| COL10A1   | 1.62 |
| ABTB2     | 1.62 |
| MIR100HG  | 1.62 |
| TUSC3     | 1.62 |
| LRRK2     | 1.61 |
| TMEM79    | 1.61 |

|           |      |
|-----------|------|
| PDLIM4    | 1.61 |
| NOX4      | 1.60 |
| COL13A1   | 1.60 |
| DOCK9-DT  | 1.59 |
| CPA3      | 1.59 |
| B3GNT3    | 1.59 |
| CORO2A    | 1.59 |
| LRATD1    | 1.58 |
| HPCAL4    | 1.58 |
| ECM1      | 1.58 |
| TMEM92    | 1.58 |
| NRCAM     | 1.58 |
| PLAU      | 1.58 |
| RUNX2     | 1.57 |
| TNFAIP6   | 1.57 |
| TACSTD2   | 1.57 |
| PCSK1N    | 1.57 |
| KCNJ5     | 1.56 |
| ALOX5     | 1.56 |
| LINC00891 | 1.55 |
| NHSL2     | 1.54 |
| POU2F3    | 1.54 |
| INAVA     | 1.54 |
| SFTPB     | 1.54 |
| CRLF1     | 1.53 |
| CLDN1     | 1.53 |
| EPPK1     | 1.53 |
| KRT19     | 1.53 |
| RUNX1     | 1.53 |
| ADAMTS9   | 1.53 |
| NAT8L     | 1.53 |
| PRSS3P2   | 1.52 |
| IL17RD    | 1.52 |
| JAK3      | 1.52 |
| PRSS3     | 1.52 |
| PCSK2     | 1.52 |
| FAP       | 1.52 |
| TNFRSF12A | 1.50 |

**Supplementary Table 4.** List of downregulated genes and their fold change in non-aggressive set

| <b>Gene Name</b> | <b>Fold Change</b> |
|------------------|--------------------|
| MPPED2           | 0.50               |
| ELAPOR1          | 0.50               |
| ADH1B            | 0.50               |
| PKHD1L1          | 0.50               |
| TFCP2L1          | 0.49               |
| COL23A1          | 0.49               |
| NEB              | 0.49               |
| GPM6A            | 0.49               |
| DIRAS2           | 0.48               |
| TFF3             | 0.48               |
| SPX              | 0.48               |
| KCNIP4           | 0.48               |
| GJB6             | 0.48               |
| LYVE1            | 0.47               |
| RGS8             | 0.47               |
| DIO1             | 0.47               |
| SERTM1           | 0.47               |
| RYR2             | 0.46               |
| DGKI             | 0.45               |
| IRS4             | 0.45               |
| CDH16            | 0.45               |
| STXBP5L          | 0.44               |
| ZMAT4            | 0.42               |
| MRO              | 0.42               |
| IGFBPL1          | 0.41               |
| MMRN1            | 0.40               |
| SNORD3B-1        | 0.38               |
| LRP1B            | 0.38               |

**Supplementary Table 5.** List of genes and their frequency in metastatic set

| <b>Gene</b> | <b>Frequency</b> |
|-------------|------------------|
| EGFR        | 26               |
| PTK2B       | 25               |
| RYR2        | 24               |
| BCL2        | 23               |
| CACNA1D     | 23               |
| SFRP1       | 23               |
| CXCL12      | 22               |
| GPB1        | 22               |
| KCNJ2       | 22               |
| KCNQ1       | 22               |
| RYR1        | 22               |
| ABL1        | 21               |



|          |    |
|----------|----|
| ADRA2A   | 21 |
| SLC8A1   | 21 |
| CDK5     | 20 |
| DMD      | 20 |
| EDN1     | 20 |
| FKBP1B   | 20 |
| ITPR1    | 20 |
| RGS2     | 20 |
| SRC      | 20 |
| ANK2     | 19 |
| CRABP2   | 19 |
| FYN      | 19 |
| AGT      | 18 |
| AKT1     | 18 |
| CACNA1A  | 18 |
| CAV1     | 18 |
| CX3CL1   | 18 |
| EFEMP1   | 18 |
| FGFR3    | 18 |
| HBEGF    | 18 |
| INHBB    | 18 |
| KIT      | 18 |
| PSEN1    | 18 |
| ADRB2    | 17 |
| ANXA6    | 17 |
| CACNA2D1 | 17 |
| FGF13    | 17 |
| KCNJ5    | 17 |
| KCNMA1   | 17 |
| KCNN4    | 17 |
| MCOLN3   | 17 |
| NTRK2    | 17 |
| P2RX7    | 17 |
| SCN4B    | 17 |
| BAX      | 16 |
| CACNA2D2 | 16 |
| CACNB3   | 16 |
| CALM3    | 16 |
| CRABP1   | 16 |
| CYP1B1   | 16 |
| CYP26B1  | 16 |
| FGFR1    | 16 |
| IRS1     | 16 |
| ITPR2    | 16 |
| ITPR3    | 16 |
| KCNK5    | 16 |
| KCNQ3    | 16 |
| MYO5A    | 16 |
| NRP1     | 16 |
| PTN      | 16 |

|         |    |
|---------|----|
| RELN    | 16 |
| SRI     | 16 |
| ADORA1  | 15 |
| AKR1C3  | 15 |
| ATP1B1  | 15 |
| CALM1   | 15 |
| CALM2   | 15 |
| CAMK2D  | 15 |
| ERBB2   | 15 |
| F2R     | 15 |
| GHR     | 15 |
| GRIN2C  | 15 |
| KCNAB1  | 15 |
| KCNE3   | 15 |
| KCNE4   | 15 |
| LCK     | 15 |
| P2RX4   | 15 |
| PPARG   | 15 |
| PTEN    | 15 |
| RGS4    | 15 |
| S100A1  | 15 |
| S100A9  | 15 |
| SCNN1A  | 15 |
| TRPC1   | 15 |
| ALDH1A1 | 14 |
| APOE    | 14 |
| CACNG6  | 14 |
| CCN2    | 14 |
| CHRNA7  | 14 |
| DUOX1   | 14 |
| ERBB4   | 14 |
| FGFR2   | 14 |
| FHL1    | 14 |
| FLNA    | 14 |
| GAS6    | 14 |
| GRIK2   | 14 |
| HCN4    | 14 |
| HTT     | 14 |
| IL1B    | 14 |
| KCNIP4  | 14 |
| KCNJ8   | 14 |
| LPL     | 14 |
| LYN     | 14 |
| NEDD4L  | 14 |
| NRCAM   | 14 |
| PAK1    | 14 |
| PLCG1   | 14 |
| PLN     | 14 |
| S100A8  | 14 |
| SNCA    | 14 |

|           |    |
|-----------|----|
| TREM2     | 14 |
| VEGFA     | 14 |
| ABCC3     | 13 |
| ACKR3     | 13 |
| AGR2      | 13 |
| ANGPTL4   | 13 |
| ANO1      | 13 |
| CACNA1I   | 13 |
| CCN3      | 13 |
| CXADR     | 13 |
| DUSP4     | 13 |
| DUSP6     | 13 |
| EDN3      | 13 |
| EHD3      | 13 |
| EPHB3     | 13 |
| ESR1      | 13 |
| FXYD1     | 13 |
| GABRB3    | 13 |
| GAS1      | 13 |
| IGF1      | 13 |
| INSR      | 13 |
| JAK2      | 13 |
| KCNAB2    | 13 |
| KCNJ15    | 13 |
| KCNJ16    | 13 |
| KCNK1     | 13 |
| KCNS3     | 13 |
| LRRK2     | 13 |
| NR2F2     | 13 |
| PDGFRA    | 13 |
| PLCB1     | 13 |
| PPARD     | 13 |
| PRKACA    | 13 |
| PRKCE     | 13 |
| PTPRC     | 13 |
| RET       | 13 |
| SCNN1G    | 13 |
| SEMA6D    | 13 |
| SFN       | 13 |
| SLC1A1    | 13 |
| SLC30A4   | 13 |
| SPP1      | 13 |
| TMEM38B   | 13 |
| TNFRSF12A | 13 |
| TRPV2     | 13 |
| ACACB     | 12 |
| ALDH1A3   | 12 |
| AQP1      | 12 |
| AR        | 12 |
| ATP1B2    | 12 |

|         |    |
|---------|----|
| ATP2A2  | 12 |
| CD44    | 12 |
| CLIC2   | 12 |
| CXCL10  | 12 |
| CYBA    | 12 |
| DPP6    | 12 |
| FABP4   | 12 |
| FGFBP1  | 12 |
| FXD3    | 12 |
| GATA3   | 12 |
| GDF15   | 12 |
| GSK3B   | 12 |
| HSPA2   | 12 |
| IGFBP2  | 12 |
| KCNIP3  | 12 |
| KCNK3   | 12 |
| KLF4    | 12 |
| LRP8    | 12 |
| MCOLN1  | 12 |
| MEF2C   | 12 |
| NTRK3   | 12 |
| PDE4D   | 12 |
| PTPN3   | 12 |
| SLC39A8 | 12 |
| STIM2   | 12 |
| TGFA    | 12 |
| THY1    | 12 |
| TRPC6   | 12 |
| VAV3    | 12 |
| ABCA8   | 11 |
| ACVR1   | 11 |
| ADM     | 11 |
| AKR1C1  | 11 |
| AREG    | 11 |
| ATP2B1  | 11 |
| ATP2C2  | 11 |
| BID     | 11 |
| BMP7    | 11 |
| CAPN3   | 11 |
| CCL5    | 11 |
| CD36    | 11 |
| CDH16   | 11 |
| CDKN2A  | 11 |
| CHP1    | 11 |
| CHRM3   | 11 |
| CLIC4   | 11 |
| CORO1A  | 11 |
| CRLF1   | 11 |
| CXCL14  | 11 |
| DAPK1   | 11 |

|          |    |
|----------|----|
| DPT      | 11 |
| EFNA5    | 11 |
| EPHA3    | 11 |
| EPHA4    | 11 |
| FGF1     | 11 |
| FGF7     | 11 |
| FLT1     | 11 |
| FOXO3    | 11 |
| GABRB2   | 11 |
| GABRE    | 11 |
| GLRB     | 11 |
| GNA14    | 11 |
| GSTO1    | 11 |
| HPN      | 11 |
| HYAL2    | 11 |
| ICAM1    | 11 |
| IGF1R    | 11 |
| IGF2     | 11 |
| INHBA    | 11 |
| ITIH5    | 11 |
| JPH1     | 11 |
| KCNK17   | 11 |
| KCNMB1   | 11 |
| KCNQ5    | 11 |
| KITLG    | 11 |
| LRP1     | 11 |
| MAP2K6   | 11 |
| MST1R    | 11 |
| MYLK     | 11 |
| NCS1     | 11 |
| NDUFA4L2 | 11 |
| NLGN2    | 11 |
| NMU      | 11 |
| NR4A3    | 11 |
| NRP2     | 11 |
| PAK2     | 11 |
| PDE4B    | 11 |
| PDGFB    | 11 |
| PDPK1    | 11 |
| PINK1    | 11 |
| PLCG2    | 11 |
| RAF1     | 11 |
| RAMP3    | 11 |
| RARA     | 11 |
| RARB     | 11 |
| RBP1     | 11 |
| S100A6   | 11 |
| SHANK3   | 11 |
| SHC1     | 11 |
| SLC19A1  | 11 |

|            |    |
|------------|----|
| SLC1A4     | 11 |
| SLC24A1    | 11 |
| SLC24A3    | 11 |
| SLC26A4    | 11 |
| SLC6A6     | 11 |
| SLC8B1     | 11 |
| SNTA1      | 11 |
| SOX9       | 11 |
| SREBF1     | 11 |
| ST6GALNAC2 | 11 |
| STK39      | 11 |
| SYT17      | 11 |
| TCIRG1     | 11 |
| TENM1      | 11 |
| TGFB2      | 11 |
| THBS4      | 11 |
| TNFRSF21   | 11 |
| TTYH2      | 11 |

**Supplementary Table 6.** List of genes and their frequency in non-aggressive set

| <b>Gene</b> | <b>Frequency</b> |
|-------------|------------------|
| KCNQ1       | 38               |
| CACNA1D     | 37               |
| PTK2B       | 35               |
| EDN1        | 34               |
| SFRP1       | 33               |
| ABAT        | 32               |
| KCNJ2       | 32               |
| KCNJ5       | 32               |
| KCNS3       | 32               |
| ADRA2A      | 31               |
| ANO1        | 31               |
| BCL2        | 31               |
| CACNA2D2    | 31               |
| FKBP1B      | 31               |
| GPER1       | 31               |
| AGT         | 30               |
| CACNB3      | 30               |
| HCN4        | 30               |
| ITPR1       | 30               |
| KIT         | 30               |
| CACNA1A     | 29               |
| EDN3        | 29               |
| EGFR        | 29               |
| KCNAB1      | 29               |
| KCNE4       | 29               |
| RYR2        | 29               |
| KCNE3       | 27               |

|         |    |
|---------|----|
| KCNJ8   | 27 |
| KCNK1   | 27 |
| KCNMA1  | 27 |
| KCNQ3   | 27 |
| SCN4B   | 27 |
| ADORA1  | 26 |
| CXCL12  | 26 |
| GRIN2C  | 26 |
| PTEN    | 26 |
| RGS4    | 26 |
| AKR1C3  | 25 |
| GRIK2   | 25 |
| ITPR3   | 25 |
| KCNK3   | 25 |
| KCNK5   | 25 |
| KCNN4   | 25 |
| RELN    | 25 |
| RYR1    | 25 |
| SCNN1A  | 25 |
| SLC1A1  | 25 |
| CHRNA7  | 24 |
| HPN     | 24 |
| ITPR2   | 24 |
| KCNAB2  | 24 |
| KCNJ15  | 24 |
| KCNJ16  | 24 |
| ALDH1A1 | 23 |
| CAV1    | 23 |
| CDK5    | 23 |
| DUSP6   | 23 |
| IL1B    | 23 |
| ITGA2   | 23 |
| P2RX4   | 23 |
| P2RX7   | 23 |
| ADRB2   | 22 |
| AKT1    | 22 |
| BMP2    | 22 |
| CACNA1I | 22 |
| CARTPT  | 22 |
| CCN3    | 22 |
| EFEMP1  | 22 |
| FHL1    | 22 |
| GHR     | 22 |
| INHBB   | 22 |
| KCNIP4  | 22 |
| NMU     | 22 |
| SCNN1G  | 22 |
| SLC8A1  | 22 |
| ANXA6   | 21 |
| APOE    | 21 |

|          |    |
|----------|----|
| CACNA2D1 | 21 |
| CLIC6    | 21 |
| CYP1B1   | 21 |
| DPP6     | 21 |
| IGF1     | 21 |
| IRS1     | 21 |
| NLGN2    | 21 |
| NTRK2    | 21 |
| RGS2     | 21 |
| SLC27A2  | 21 |
| SRI      | 21 |
| SYT1     | 21 |
| ADM      | 20 |
| AKR1C1   | 20 |
| ALDH1A3  | 20 |
| AQP1     | 20 |
| CCL5     | 20 |
| CRABP2   | 20 |
| CXCL14   | 20 |
| FGF13    | 20 |
| FXD1     | 20 |
| KCNIP3   | 20 |
| MCOLN3   | 20 |
| NTRK3    | 20 |
| REST     | 20 |
| RET      | 20 |
| SLC26A4  | 20 |
| SNCA     | 20 |
| BMP7     | 19 |
| CRABP1   | 19 |
| DHRS3    | 19 |
| DUSP4    | 19 |
| FGFR3    | 19 |
| FXD3     | 19 |
| FYN      | 19 |
| GABRB3   | 19 |
| KCNJ13   | 19 |
| KCNQ5    | 19 |
| LPL      | 19 |
| PPARD    | 19 |
| PSEN1    | 19 |
| TFF3     | 19 |
| TRPV2    | 19 |
| VDR      | 19 |
| ANXA9    | 18 |
| AQP3     | 18 |
| ATP1B1   | 18 |
| ATP1B2   | 18 |
| AVPR1A   | 18 |
| CACNG6   | 18 |



|          |    |
|----------|----|
| CALM1    | 18 |
| CHRN1    | 18 |
| CLIC5    | 18 |
| COMP     | 18 |
| FGFR1    | 18 |
| FLT1     | 18 |
| GABRE    | 18 |
| GLRB     | 18 |
| GPC3     | 18 |
| KCNMB1   | 18 |
| KCNMB4   | 18 |
| MYLK     | 18 |
| NRCAM    | 18 |
| NRP1     | 18 |
| PPARG    | 18 |
| PRKCE    | 18 |
| SERPINE2 | 18 |
| SLC1A3   | 18 |
| SLC1A4   | 18 |
| SLC24A1  | 18 |
| SLC8B1   | 18 |
| SPTBN2   | 18 |
| ANK2     | 17 |
| BEST1    | 17 |
| CCN2     | 17 |
| CD36     | 17 |
| CDKN1A   | 17 |
| CDKN2A   | 17 |
| CLIC3    | 17 |
| CXCR4    | 17 |
| DMD      | 17 |
| DPT      | 17 |
| EPHB1    | 17 |
| EPHB3    | 17 |
| ERBB4    | 17 |
| F2R      | 17 |
| FAM155B  | 17 |
| FBP1     | 17 |
| FLNA     | 17 |
| GABRB2   | 17 |
| GCH1     | 17 |
| GPM6A    | 17 |
| JAK2     | 17 |
| KALRN    | 17 |
| LRRK2    | 17 |
| MAP2K6   | 17 |
| PDGFRA   | 17 |
| PIEZO2   | 17 |
| RARB     | 17 |
| RGN      | 17 |

|         |    |
|---------|----|
| RRAD    | 17 |
| SEMA6D  | 17 |
| SLC24A3 | 17 |
| SLC6A6  | 17 |
| SLIT2   | 17 |
| SYT17   | 17 |
| TBX3    | 17 |
| TMEM38B | 17 |
| TRPC1   | 17 |
| ABL1    | 16 |
| ADH1B   | 16 |
| ANO6    | 16 |
| BACE2   | 16 |
| CAMK2B  | 16 |
| CCL3    | 16 |
| CLIC2   | 16 |
| CLTRN   | 16 |
| CYP26B1 | 16 |
| DPP4    | 16 |
| EPHA4   | 16 |
| ESR1    | 16 |
| FABP5   | 16 |
| FOS     | 16 |
| GAS1    | 16 |
| GAS6    | 16 |
| GATA3   | 16 |
| GDF15   | 16 |
| GNA14   | 16 |
| HEY1    | 16 |
| IGF2    | 16 |
| KCNK17  | 16 |
| KCNT2   | 16 |
| KIF5C   | 16 |
| LGALS3  | 16 |
| MEF2C   | 16 |
| NEDD4L  | 16 |
| PDGFB   | 16 |
| PRKG1   | 16 |
| PROM1   | 16 |
| PTGS2   | 16 |
| PTN     | 16 |
| PTPN11  | 16 |
| PTPRN2  | 16 |
| SHANK2  | 16 |
| SLC16A2 | 16 |
| SLC30A4 | 16 |
| SLC39A8 | 16 |
| SLC9A3  | 16 |
| SPP1    | 16 |
| SREBF1  | 16 |

|          |    |
|----------|----|
| STK39    | 16 |
| TPCN1    | 16 |
| TRPC6    | 16 |
| TSPOAP1  | 16 |
| ZBTB16   | 16 |
| ABCC3    | 15 |
| AGR2     | 15 |
| AGTR1    | 15 |
| AKT2     | 15 |
| ANGPTL4  | 15 |
| BIN1     | 15 |
| CACHD1   | 15 |
| CAMK2D   | 15 |
| CCL2     | 15 |
| CD44     | 15 |
| CDH3     | 15 |
| CES1     | 15 |
| CLCN4    | 15 |
| CLCN5    | 15 |
| CLCNKA   | 15 |
| CLCNKB   | 15 |
| CUX2     | 15 |
| CYP27B1  | 15 |
| DUOX1    | 15 |
| GATA6    | 15 |
| HBEGF    | 15 |
| ITIH5    | 15 |
| LAMC2    | 15 |
| LRP2     | 15 |
| LTF      | 15 |
| LYN      | 15 |
| MMP9     | 15 |
| PLCG2    | 15 |
| PPARGC1A | 15 |
| PPP1R3C  | 15 |
| PRKACA   | 15 |
| PRNP     | 15 |
| RARRES1  | 15 |
| RIMS2    | 15 |
| S100A1   | 15 |
| S100A6   | 15 |
| SFN      | 15 |
| SHANK3   | 15 |
| SLC4A4   | 15 |
| SRC      | 15 |
| STC1     | 15 |
| SYT12    | 15 |
| TACSTD2  | 15 |
| TNFRSF21 | 15 |
| TREM2    | 15 |

|          |    |
|----------|----|
| YWHAE    | 15 |
| ACE      | 14 |
| ADORA2A  | 14 |
| AKAP9    | 14 |
| ANK3     | 14 |
| AQP4     | 14 |
| ARRB1    | 14 |
| ATP2A2   | 14 |
| ATP2B1   | 14 |
| ATP2C2   | 14 |
| BAX      | 14 |
| BMP8A    | 14 |
| CALM3    | 14 |
| CATSPER2 | 14 |
| CCND1    | 14 |
| CLIC4    | 14 |
| CRLF1    | 14 |
| CYP2E1   | 14 |
| DMPK     | 14 |
| DSG2     | 14 |
| EFNA5    | 14 |
| EGR1     | 14 |
| EHD3     | 14 |
| EPHA3    | 14 |
| EPHX2    | 14 |
| ERBB2    | 14 |
| HBA1     | 14 |
| HGF      | 14 |
| HMGCR    | 14 |
| IGFBP3   | 14 |
| INHBA    | 14 |
| JUN      | 14 |
| LCN2     | 14 |
| MCOLN1   | 14 |
| MLPH     | 14 |
| MUC1     | 14 |
| MYO5A    | 14 |
| NALCN    | 14 |
| NCAM1    | 14 |
| NCS1     | 14 |
| NELL2    | 14 |
| NR2F2    | 14 |
| PAK3     | 14 |
| PARM1    | 14 |
| PCLO     | 14 |
| PDCD4    | 14 |
| PDE4B    | 14 |
| PDE4D    | 14 |
| PEG3     | 14 |
| PLN      | 14 |

|            |    |
|------------|----|
| PTPN3      | 14 |
| RAB11FIP1  | 14 |
| RDH10      | 14 |
| RDH5       | 14 |
| RGS16      | 14 |
| RTN1       | 14 |
| SFRP4      | 14 |
| SHROOM2    | 14 |
| SLC12A2    | 14 |
| SLC12A4    | 14 |
| SLC12A8    | 14 |
| SLC16A1    | 14 |
| SLC34A2    | 14 |
| SLC47A1    | 14 |
| SLIT3      | 14 |
| SNTA1      | 14 |
| SOCS2      | 14 |
| SORBS2     | 14 |
| ST3GAL6    | 14 |
| ST6GALNAC2 | 14 |
| SYBU       | 14 |
| SYK        | 14 |
| TESC       | 14 |
| TGFB2      | 14 |
| TIAM1      | 14 |
| TMEM37     | 14 |
| TNFRSF12A  | 14 |
| TSPAN1     | 14 |

**Supplementary Table 7.** List of highly expressed genes in papillary thyroid samples from Ukraine, Brazil and South Korean population with log fold change >2.

| <b>Ukraine</b> | <b>Brazil</b> | <b>South Korea</b> |
|----------------|---------------|--------------------|
| CRABP1         | TFF3          | LAMB3              |
| TFF3           | MAPK4         | TBC1D2             |
| MMRN1          | LRP1B         | TGFA               |
| LYVE1          | TBX22         | STRA6              |
| CDH16          | ZMAT4         | RYR1               |
| IPCEF1         | STXBP5L       | NGEF               |
| ADH1B          | LOC646736     | LRP4               |
| LYVE1          | KHDRBS2       | NAB2               |
| BEX1           | ADH1A         | ALDH3B1            |
| PKHD1L1        | SLC4A4        | MPZL2              |
| CCL21          | SLC26A4       | MXRA8              |
| DGKI           | SLC4A4        | METTL7B            |
| ADH1B          | KIT           | SHROOM4            |
| DPP6           | SLC26A7       | CYP2S1             |
| LRP1B          | MT1F          | DPP4               |

|           |                                   |           |
|-----------|-----------------------------------|-----------|
| IGFBPL1   | MRO                               | AQP4      |
| DIO1      | FAM167A                           | MET       |
| TFCP2L1   | NCAM1                             | MMP16     |
| COL9A3    | ENST00000318245                   | DUSP6     |
| PLA2R1    | LRRC7                             | DUSP6     |
| TPO       | WNT11                             | AGTR1     |
| EPHB1     | DPP6                              | PROS1     |
| DPP6      | CD36                              | MPZL2     |
| SCARA5    | KCNK2                             | PLCD3     |
| BMP8A     | JAKMIP3                           | KRT19     |
| SLC4A4    | NLGN1                             | RNF24     |
| TCEAL2    | CRABP1                            | GOLT1A    |
| WDR72     | HSD17B6                           | MPZL2     |
| KIT       | CRABP1                            | ALDH1A3   |
| GPM6A     | GPR98                             | C8orf88   |
| CWH43     | AOX1                              | TNFRSF12A |
| RGS8      | FLRT1                             |           |
| WSCD2     | GPC3                              | AHNAK2    |
| AOX1      | C19orf20                          | CLDN1     |
| RELN      | DLG2                              | ZMAT3     |
| BMP8A     |                                   | TGFA      |
| SLITRK5   | AOX1                              | MGAT3     |
| MPPED2    | HBB                               |           |
| OCA2      | DLG2                              | MAPK4     |
| MRO       | MPPED2                            | RAPGEF5   |
| SLC4A4    | CSGALNACT1                        | SERPINA1  |
| GJB6      | FLJ35024                          | TUSC3     |
| GPM6A     | RELN                              | FHOD1     |
| SMOC2     | DPT                               | MST1R     |
| ZMAT4     | CCDC146                           | QPCT      |
| CLCNKB    | RAG1                              | TENM1     |
| SLC4A4    | HBA2                              | FAM189A1  |
| NEB       | lincRNA:chr18:53750592-53804748_R | DOCK9     |
| CWH43     | ELMO1                             | SERINC2   |
| SPX       | HBB                               | AHNAK2    |
| PPARGC1A  | ABCA8                             | KCNQ3     |
| HGD       | DLG2                              | RAB34     |
| DLG2      | SH2D6                             | SERPINA1  |
| OGDHL     | HBB                               | MPZL2     |
| DPT       | GAS1                              | KCNIP4    |
| SCUBE3    | IRS1                              | GALE      |
| NCAM1     | SMOC2                             | SIPA1L2   |
| LOC440934 | SORBS2                            |           |
| WDR72     | ANGPTL1                           | SBSPON    |
| DPT       | PRPH2                             | NRCAM     |

|              |                                   |          |
|--------------|-----------------------------------|----------|
| DIRAS2       | RELN                              | LPAR5    |
| KCNIP4       | GHR                               |          |
| NCAM1        | lincRNA:chr13:33922751-33922994_R | ETV4     |
| TPPP         | GNA14                             | KLK11    |
| RYR2         | SORBS2                            | IGSF1    |
| FOXP2        | GHR                               | ZMAT4    |
| MUM1L1       | MFAP4                             | MMRN1    |
| STXBP5L      | SGCD                              |          |
| CHRD1        | TNFRSF11B                         | WSCD2    |
| SERTM1       | RNF150                            | PLA2R1   |
| SLC25A15     | VIPR1                             | PLA2R1   |
| LINGO2       | DCN                               | IGSF1    |
| FAM167A      | LOC100130692                      | CDH3     |
| EDN3         | TNFRSF11B                         | TMEM163  |
| SCUBE3       |                                   | MPPED2   |
| RASSF6       |                                   | PLCH1    |
| SCARA5       |                                   | CLEC16A  |
| AVPR1A       |                                   | BID      |
| FOXP2        |                                   | FRMD3    |
| GLT8D2       |                                   | KIAA1324 |
| GLT8D2       |                                   | RDH5     |
| LIFR         |                                   |          |
| OGN          |                                   | MDK      |
| FLRT1        |                                   |          |
| PDLIM3       |                                   | RAB27A   |
| ANK2         |                                   | ARHGAP24 |
| LMOD1        |                                   | PLEKHA4  |
| FBLN1        |                                   | ENTPD1   |
| ATP6V0E2-AS1 |                                   | CLCNKA   |
| FBLN1        |                                   | ANGPTL1  |
| PAPSS2       |                                   | ITGA9    |
| KCNJ13       |                                   | PDE5A    |
| SLC25A15     |                                   | ARHGAP24 |
| TFCP2L1      |                                   | ALDH1A3  |
| PAPSS2       |                                   | TM4SF1   |
| LOC646736    |                                   | UST      |
| TMEM139      |                                   |          |
| LOC100129129 |                                   |          |
| RAP1GAP      |                                   |          |
| CALCA        |                                   |          |
| DLG2         |                                   |          |
| LIFR         |                                   |          |
| HGD          |                                   |          |
| LIFR         |                                   |          |
| COL23A1      |                                   |          |

|                                                     |  |  |
|-----------------------------------------------------|--|--|
| SNORD3D///SNORD3C///SNORD3B-2///SNORD3A///SNORD3B-1 |  |  |
| ELMO1                                               |  |  |
| FIBIN                                               |  |  |
| OGN                                                 |  |  |
| ATP2C2                                              |  |  |
| IP6K3                                               |  |  |
| AKR1C1                                              |  |  |
| SLC4A4                                              |  |  |
| PKNOX2                                              |  |  |
| MPPED2                                              |  |  |
| GLDC                                                |  |  |
| GSTM3                                               |  |  |
| LIFR                                                |  |  |
| CLCNKB///CLCNKA                                     |  |  |
| SLC26A7                                             |  |  |
| AGR3                                                |  |  |
| GPR83                                               |  |  |
